# Supplementary material for: Occupational exposure to solar ultraviolet B radiation and risk of subtypes of breast cancer in Danish women
Source: HighWire-hosted journal article supplement (doi:10.1136/oemed-2020-107125), 2021-02-02

Supplementary figure 1. Directed Acyclic Graph (DAG) for confounder selection in the association between solar ultraviolet-B radiation exposure and breast cancer risk.

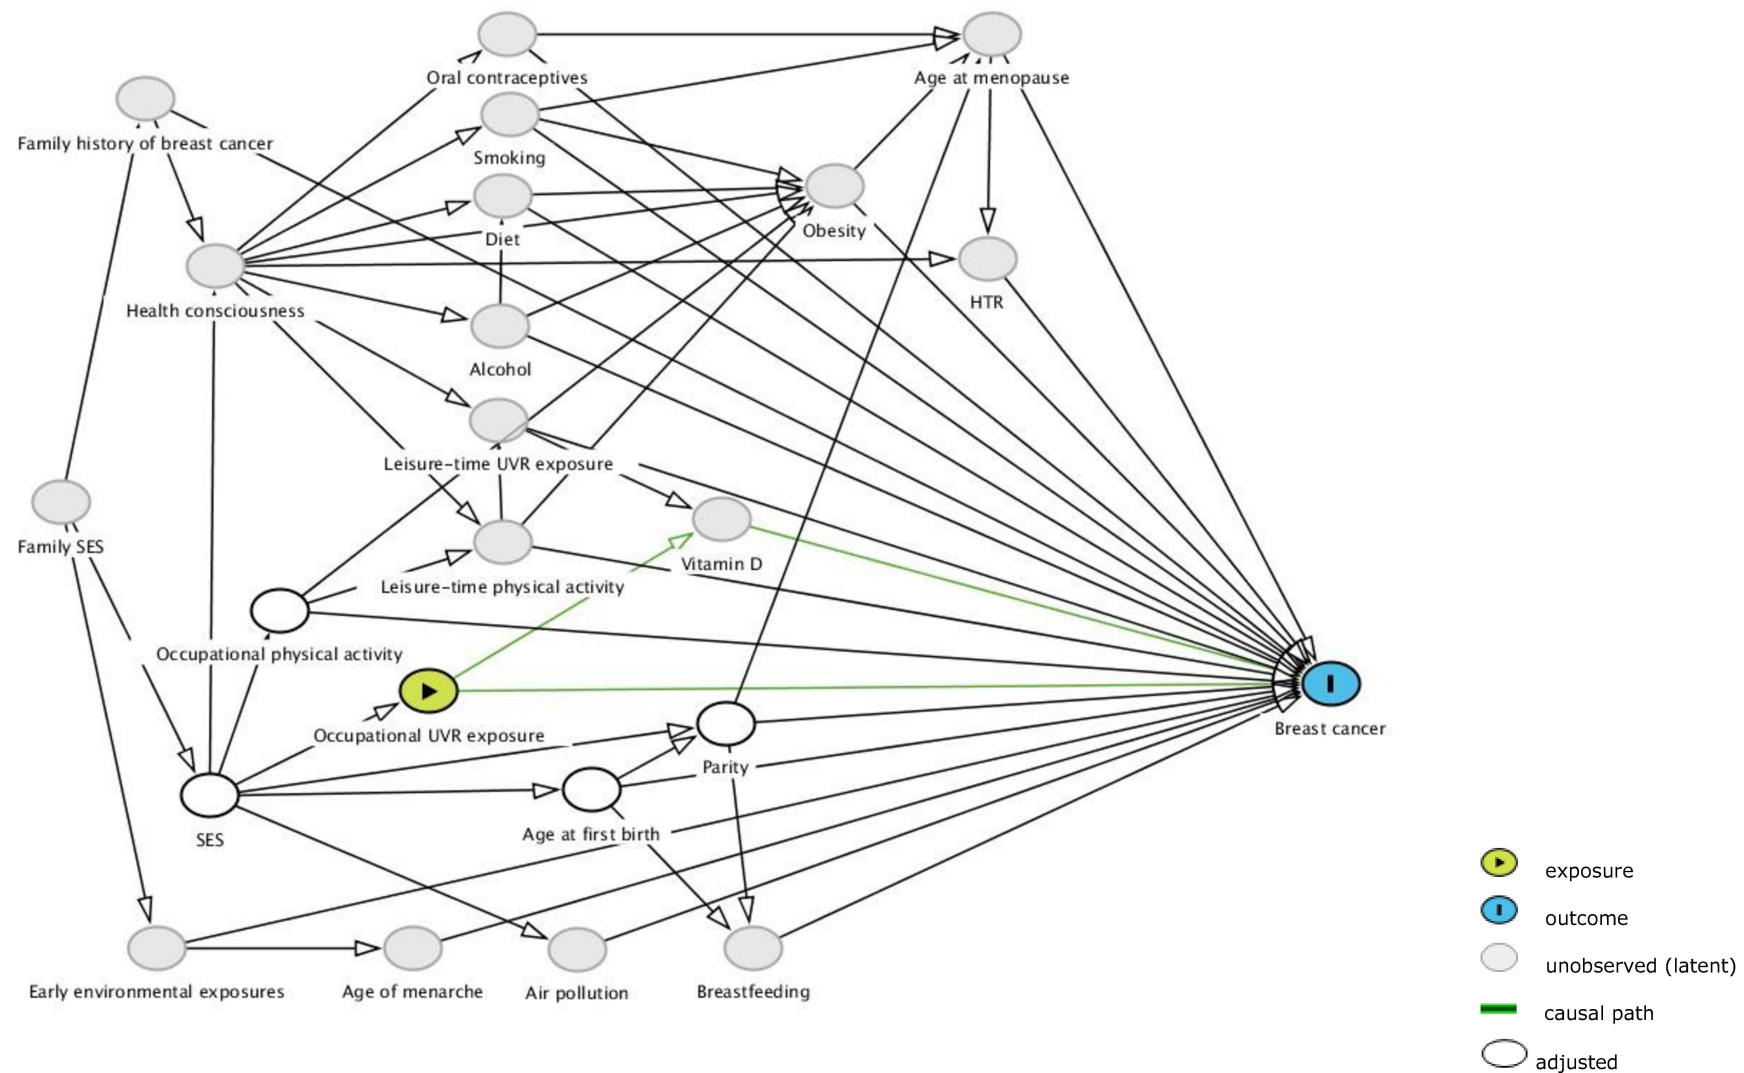

Supplement: oemed-2020-107125supp001_data_supplement.pdf [file oemed-2020-107125supp001_data_supplement.pdf]
