# Supplementary material for: Occupational exposure to solar ultraviolet B radiation and risk of subtypes of breast cancer in Danish women
Source: HighWire-hosted journal article supplement (doi:10.1136/oemed-2020-107125), 2021-02-02
Supplement: oemed-2020-107125supp002_data_supplement.pdf [file oemed-2020-107125supp002_data_supplement.pdf]

Supplementary table 1. Danish industries with UVR exposure classified by DSE

| Industry                                         | DSE         | Exposure level |
|--------------------------------------------------|-------------|----------------|
| Agriculture, unspecified                         | 11101       | High           |
| Horticulture and orchards                        | 11102       | High           |
| Landscapers                                      | 11103       | Medium         |
| Fur farming                                      | 11104-11107 | Low            |
| Farming, crops                                   | 11111       | High           |
| Farming, livestock                               | 11112       | Medium         |
| Agricultural machinery stations, etc.            | 11201-11209 | Medium         |
| Hunting                                          | 11300       | High           |
| Forestry                                         | 12000       | High           |
| Fishery                                          | 13000-13010 | High           |
| Fresh-water fishery                              | 13020-13029 | High           |
| Extraction of raw materials                      | 20000-21000 | Low            |
| Extraction of oil and natural gas                | 22000       | Medium         |
| Extraction of raw materials                      | 23000-29010 | Low            |
| Clay and gravel pits                             | 29010       | Medium         |
| Extraction of raw materials                      | 29012-29090 | Low            |
| Mills                                            | 31160       | Low            |
| Sawmills, etc.                                   | 33111       | Low            |
| Petroleum industry                               | 35300-35409 | Low            |
| Stone cutters                                    | 36991       | Low            |
| Shipyards and boat builders                      | 38410-38411 | Low            |
| Wooden shipyards and boat builders               | 38412       | Medium         |
| Building and planning activities                 | 50000       | Medium         |
| Public building and planning industry            | 50110       | Medium         |
| General contracting businesses                   | 50121       | Medium         |
| Other building and planning activities           | 50122       | Medium         |
| Paving experts                                   | 50123       | High           |
| Sewer experts                                    | 50124       | Medium         |
| Bricklaying                                      | 50130       | High           |
| Building and carpentry                           | 50140       | Low            |
| Glazing                                          | 50180       | Low            |
| Insulation                                       | 50192       | Low            |
| Roofing                                          | 50193       | High           |
| Other building and planning activities           | 50194-50195 | Medium         |
| Scaffolding                                      | 50196       | High           |
| Other entrepreneur activities                    | 50199       | Medium         |
| Service stations                                 | 62213-62222 | Low            |
| Transportation, warehouse and storage businesses | 71000-71100 | Low            |
| Railroads                                        | 71110       | Low            |
| Moving services                                  | 71142       | Low            |
| Rescue operations                                | 71162       | Low            |
| Ferries                                          | 71212       | Low            |

|                                                       |             |        |
|-------------------------------------------------------|-------------|--------|
| Sea and lake transportation, other                    | 71219       | Low    |
| Towing, salvage and rescue services                   | 71231       | Low    |
| Harbors                                               | 71232       | Medium |
| Loading and unloading contractors (stevedores)        | 71233-71239 | Low    |
| Airports                                              | 71321-71329 | Low    |
| Transportation industries                             | 71910-71919 | Low    |
| Postal services                                       | 72001       | Low    |
| Agricultural consultants                              | 83294       | Low    |
| Marine                                                | 91032       | Medium |
| Army                                                  | 91033       | Medium |
| Civil defense                                         | 91034       | Medium |
| Home guard                                            | 91035       | Medium |
| The royal army                                        | 91036       | Medium |
| Sewer administration                                  | 92011       | Low    |
| Refuse removal activities                             | 92012       | Medium |
| Window cleaning                                       | 92022       | High   |
| Chimney sweeps                                        | 92023       | Medium |
| Disinfection- extermination of pests                  | 92024       | Low    |
| Day nurseries and kindergartens                       | 93402       | Low    |
| Other day care institutions for children              | 93403       | Low    |
| Orphanages                                            | 93404       | Low    |
| Other welfare institutions and societies for children | 93405       | Low    |
| Botanical gardens and Zoo                             | 94202       | Medium |
| Circus, market fairs                                  | 94900-94901 | Medium |
| Sport clubs and sport leagues                         | 94902-94909 | Medium |
